# Supplementary material for: Fusion and sorting of two parallel trains of droplets using a railroad-like channel network and guiding tracks
Source: Royal Society of Chemistry journal article supplement (doi:10.1039/c2lc40456g), 2012-01-01
Supplement: c2lc40456g.pdf [file c2lc40456g.pdf]

## Supplementary Information for *Lab on a Chip*

### Fusion and sorting of two parallel trains of droplets by using a railroad-like channel network and guiding tracks

Linfeng Xu, Hun Lee, Rajagopal Panchapakesan, and Kwang W. Oh\*

*SMALL (Sensors and MicroActuators Learning Lab)*  
Department of Electrical Engineering  
University at Buffalo, The State University of New York (SUNY at Buffalo)  
Buffalo, New York 14260, USA  
E-mail: kwangoh@buffalo.edu, <http://www.SMALL.buffalo.edu>

#### Supplementary Figure

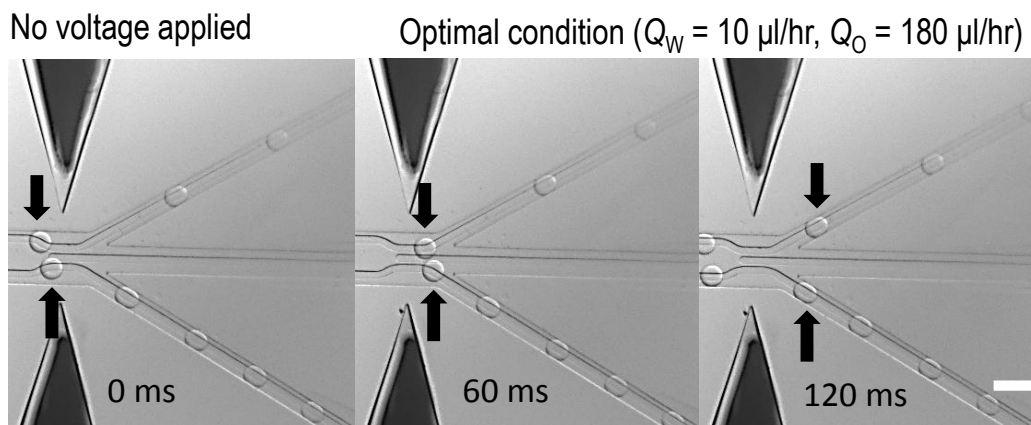

**Fig. S2** Without the voltage application, synchronized droplets are not fused and sorted to the side outlets. The scale bar is 200  $\mu\text{m}$ .
